# Supplementary material
Source: PubMed Central journal article supplement (PMC7067197)
Supplement: NIHMS1068222-supplement-Supplemental_Information.pdf [file NIHMS1068222-supplement-Supplemental_Information.pdf]

## Supporting Information

### Antibody-Linked Fluorogen-Activating Proteins for Antigen Detection and Cell Ablation

**Daniel S. Ackerman<sup>†,§</sup>, Burcin Altun<sup>‡</sup>, Dmytro Kolodieznyi<sup>††,§</sup>, Marcel P. Bruchez<sup>†,††,§</sup>,  
Andrew Tsourkas<sup>‡</sup>, and Jonathan W. Jarvik<sup>†,§,\*</sup>**

<sup>†</sup>Department of Biological Sciences, <sup>††</sup>Department of Chemistry, and <sup>§</sup>Molecular Biosensors and Imaging Center, Carnegie Mellon University, Pittsburgh, Pennsylvania, 15213.

<sup>‡</sup>Department of Bioengineering, University of Pennsylvania, Philadelphia, Pennsylvania, 19104.

\*Corresponding author: Jonathan W. Jarvik, Mellon Institute Room 257, 4400 Fifth Avenue, Pittsburgh, Pennsylvania, 15213. Phone: (412) 398-0490. Fax: (412) 268-7129. E-mail:

[jarvik@cmu.edu](mailto:jarvik@cmu.edu).

**A**

```

MTFKLIINGKTLKGEITIEAVDA*EAEKIFKQYANDY
GIDGEWTYDDATKTFTVTEGGSGGSYPYDVPDYAGAQ
PAQAVVTQEPSVTVSPGGTVILTTCGSGTGAVTSGHYA
NWFQQKPGQAPRALIFDTDKKYSWTPGRFSGSLLGAK
AALTISDAQPEDEAEYYCSLSDVDGYLFGGGTQLTVL
SGGGSGGGSGGGSGGGSGGGSQAVVTQEPSVTVSPGG
TVILTTCGSGTGAVTSGHYANWFQQKPGQAPRALIFDT
DKKYSWTPGRFSGSLLGAKAALTISDAQPEDEAEYYC
SLSDVDGYLFGGGTQLTVLS

```

**B**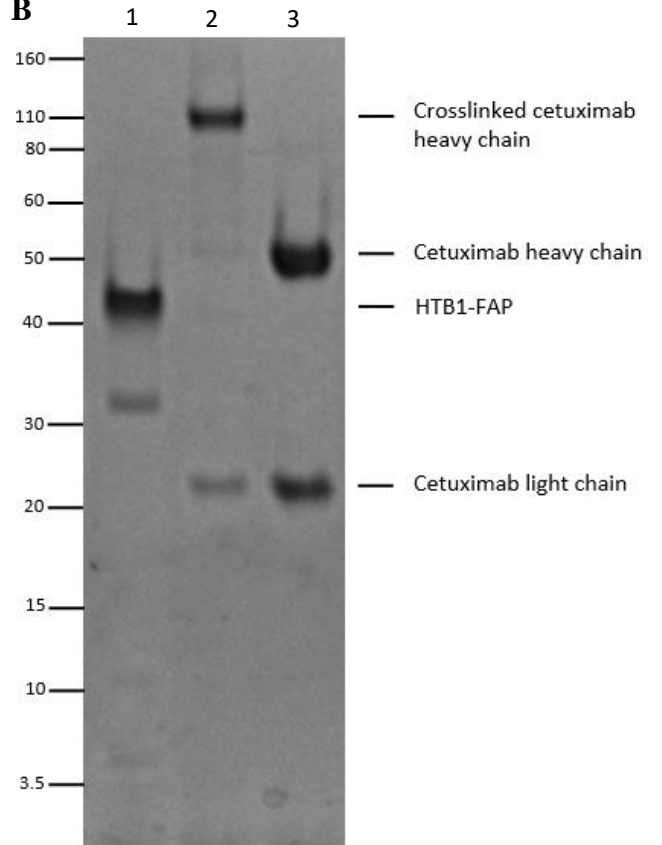

**Figure S1.** HTB1-FAP(dL5\*\*) reagent conjugated to cetuximab. (A) Amino acid sequence of HTB1-FAP polypeptide (316 amino acids). The location of the p-benzoyl-L-phenylalanine (BPA) residue is indicated by an asterisk. (B) SDS PAGE showing crosslinked polypeptides. Lane 1: HTB1-FAP polypeptide. Lane 2: Crosslinked cetuximab. Lane 3: Cetuximab alone.

**A**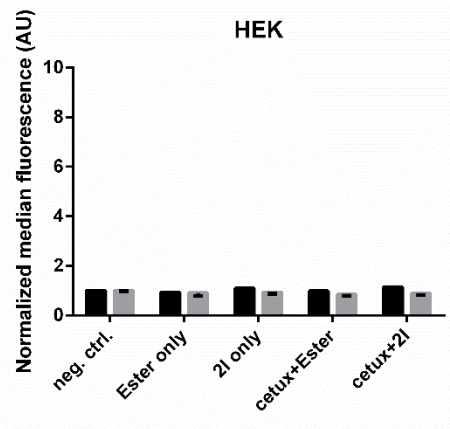**B**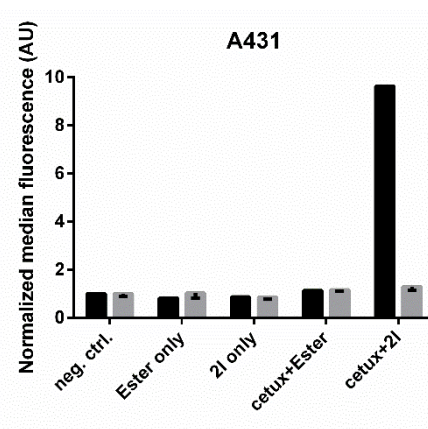**C**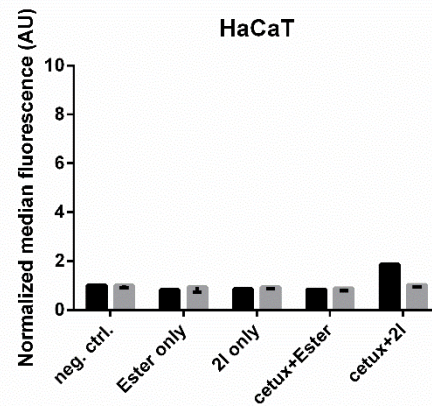

**Figure S2.** Flow cytometric analysis of cytotoxic response via Eth-D staining in HEK, HaCaT, and A431 cells after dL5\*\**-cetuximab* and MG-2I treatment and photoirradiation. Gray bars are from irradiated cells, and black bars are from non-irradiated cells. Neg. ctrl. = no antibody or dye. Ester/2I only = only fluorogen, no FAP/antibody. Cetux+Ester/2I = antibody and indicated fluorogen. Data from (A) HEK-293 cells, (B) HaCaT cells, and (C) A431 cells are shown. Numbers shown are the normalized average median FL2 signal (EthD-1 fluorescence) in arbitrary units normalized to the negative controls. Each bar is therefore the fold increase in EthD-1 signal over the negative control. Each bar is the average of three replicates  $\pm$  SD.

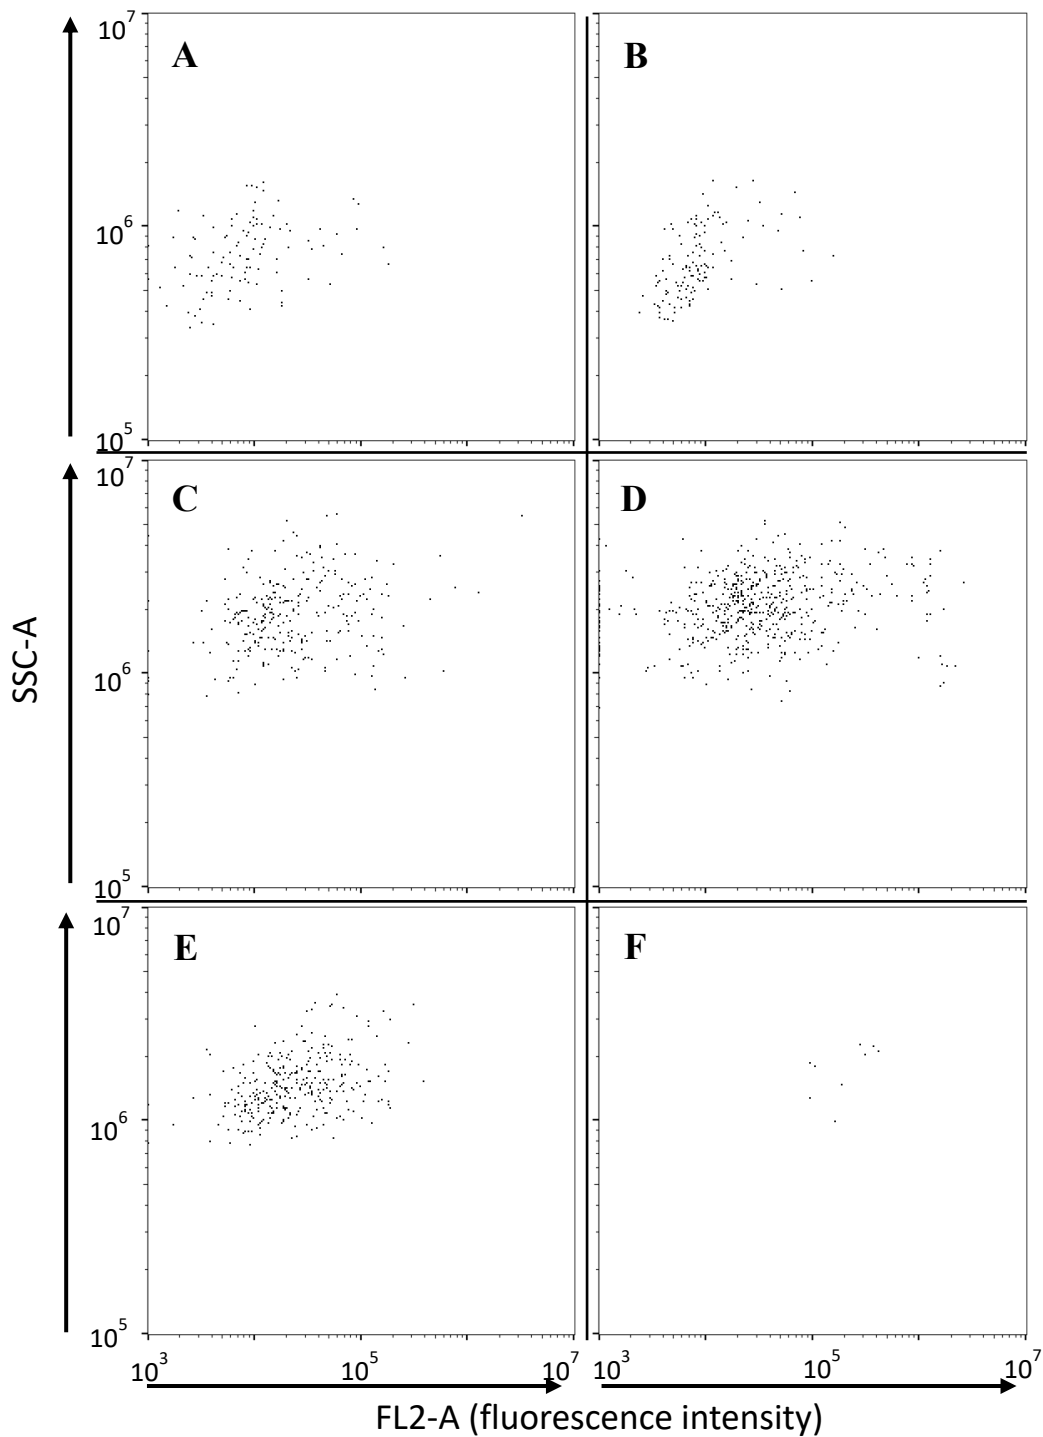

**Figure S3.** Representative dot plots from flow cytometry data shown in Figure S2. (A) and (B) HEK-293 cells. (C) and (D) HaCaT cells. (E) and (F) A431 cells. All cells shown were exposed to dL5\*\*<sup>-</sup>-cetuximab and the photosensitizing fluorogen MG-2I. Cells in the right column were irradiated with 640nm light, while cells in the left column were not irradiated. Axes are side scatter vs. fluorescence intensity in the FL-2 channel (both in arbitrary units). The FL-2 channel shows signal from the dead cell stain EthD-1.

**Table S1.** Total number of singlet cells analyzed per condition to generate the data shown in Figure S2. Irr. = cells irradiated at 640nm. Non-irr. = cells not irradiated. Neg. ctrl. = no antibody or dye. Ester/2I only = only fluorogen, no FAP/antibody. Cetux+Ester/2I = antibody and indicated fluorogen.

| <b>HEK-293 cells</b> |      |          |
|----------------------|------|----------|
|                      | Irr. | Non-irr. |
| Neg. ctrl.           | 551  | 314      |
| Ester only           | 433  | 248      |
| 2I only              | 601  | 387      |
| Cetux+Ester          | 534  | 331      |
| Cetux+2I             | 455  | 392      |
| <b>HaCaT cells</b>   |      |          |
|                      | Irr. | Non-irr. |
| Neg. ctrl.           | 1350 | 901      |
| Ester only           | 1546 | 1317     |
| 2I only              | 1385 | 1451     |
| Cetux+Ester          | 1644 | 1047     |
| Cetux+2I             | 1779 | 857      |
| <b>A431 cells</b>    |      |          |
|                      | Irr. | Non-irr. |
| Neg. ctrl.           | 1105 | 907      |
| Ester only           | 946  | 1020     |
| 2I only              | 709  | 1089     |
| Cetux+Ester          | 497  | 802      |
| Cetux+2I             | 12   | 725      |
